# Supplementary material for: Volatile and Non-Volatile Content Determination and Biological Activity Evaluation of Fresh Humulus lupulus L. (cv. Chinook) Leaves and Inflorescences
Source: MDPI journal article supplement (doi:10.3390/separations10020091), 2023-01-29
Supplement: s1 [file s1]

Archive with 1 entries (1 files):
- separations-2151179-supplementary.pdf
